# Supplementary material for: Theoretical investigation of the influence of different electric field directions and strengths on a POM-based dye for dye-sensitized solar cells
Source: Royal Society of Chemistry journal article supplement (doi:10.1039/d0qm00609b), 2020-11-16
Supplement: d0qm00609b1.pdf [file d0qm00609b1.pdf]

## Supporting Information

### **Theoretical investigation on the influence of different electric field directions and strengths on the POM-based dye for dye-sensitized solar cells**

Yu Gao <sup>a</sup>, Wei Guan <sup>a</sup>, Li-Kai Yan <sup>a, \*</sup>, Ran Jia <sup>b</sup>, and Zhong-Min Su <sup>a</sup>

<sup>a</sup> Institute of Functional Material Chemistry, National & Local United Engineering Lab for Power Battery, Key Laboratory of Polyoxometalate Science of Ministry of Education, Faculty of Chemistry, Northeast Normal University, Changchun 130024, P. R. China, Fax: +86-431-5684009.

<sup>b</sup> Laboratory of Theoretical and Computational Chemistry, Institute of Theoretical Chemistry, Jilin University, 130023 Changchun, PR China.

\* Corresponding author, E-mail address: [yanlk924@nenu.edu.cn](mailto:yanlk924@nenu.edu.cn) (L. K. Yan).

## 1. Theoretical background

The power conversion efficiency ( $\eta$ ) of DSSCs can be expressed as [1]:

$$\eta = \frac{V_{OC} J_{SC}}{FF I_S} \quad (1)$$

where  $J_{SC}$  is the short-circuit photocurrent density,  $V_{OC}$  is the open-circuit photovoltage,  $I_S$  is the intensity of the incident light and  $FF$  is the fill factor of the cell.

Accordingly, improving  $J_{SC}$  and  $V_{OC}$  is an effective method to enhance  $\eta$ . The  $J_{SC}$  can be defined as follows:

$$J_{SC} = e \int_{\lambda} IPCE \phi_{ph. AM1.5G}(\lambda) d\lambda \quad (2)$$

where  $e$  is the unit charge,  $IPCE(\lambda)$  is the incident photo-to-current conversion efficiency at a fixed wavelength,  $\phi_{ph. AM1.5G}(\lambda)$  is the corresponding photo flux of the solar radiation spectrum at a fixed wavelength.

$$IPCE = LHE(\lambda) \Phi_{inj} \eta_{reg} \eta_{col} \quad (3)$$

where  $LHE(\lambda)$ , the light harvesting efficiency at a specific wavelength, is determined by  $LHE(\lambda) = 1 - 10^{-f}$  and  $f$  is the oscillator strength of dyes corresponding to the maximum absorption  $\lambda_{max}$ .  $\eta_{col}$  is the charge collection efficiency, which is assumed to be a constant for the same DSSCs.  $\Phi_{inj}$  is the electron injection efficiency, and closely connected with  $\Delta G_{inj}$ , which can be determined by the following equation [2]:

$$\Delta G_{inj} = E_{dye}^* - E_{CB} \quad (4)$$

where  $E_{dye}^*$  is the oxidation potential of dye in the excited state, which is related to the oxidation potential of the dye in the ground state ( $E_{dye}$ ) and the vertical transition energy ( $E_v$ ), i.e.,  $E_{dye}^* = E_{dye} - E_v$  [2].  $E_{CB}$  is the reduction potential of the  $TiO_2$  conduction band (CB) and the experimental value  $-4.00$  eV (vs vacuum) is used [3].

$\eta_{\text{reg}}$  is related to the regeneration driving force  $\Delta G_{\text{reg}}$ , which is defined as the difference between the redox potential of electrolyte and  $E_{\text{dye}}$  as follows [4]:

$$\Delta G_{\text{reg}} = E_{\text{redox}} - E_{\text{dye}} \quad (5)$$

In order to evaluate the ICT abilities of dyes, the ICT parameters including the amount of transferred charges ( $q^{\text{CT}}$ ), the corresponding effective charge transfer distance ( $d^{\text{CT}}$ ) and the  $t$  index that assesses the degree of separation between  $\rho^+(r)$  and  $\rho^-(r)$  based on the total densities for ground and excited states were calculated [5,6].  $\rho^+(r)$  and  $\rho^-(r)$  are defined as the points in space where the density increment and depletion upon absorption are produced. The larger  $t$  is, the little overlap between the electron density depletion and increment regions exists. The difference of electronic densities related to the electronic transition is given by:

$$\Delta\rho(r) = \rho_{\text{ES}}(r) - \rho_{\text{GS}}(r) \quad (6)$$

$\rho_{\text{ES}}(r)$  and  $\rho_{\text{GS}}(r)$  are proposed to represent the electronic densities of excited and ground states, respectively. And  $q^{\text{CT}}$  can be proposed:

$$q^{\text{CT}} = \int \rho^+(r) \, dr \quad (7)$$

The barycenters ( $r^+$  and  $r^-$ ) of density distributions defined by  $\rho^+(r)$  and  $\rho^-(r)$  are written as the following equations:

$$r^+ = (x^+, y^+, z^+) = 1/q^{\text{CT}} \int r \rho^+(r) \, dr \quad (8)$$

$$r^- = (x^-, y^-, z^-) = 1/q^{\text{CT}} \int r \rho^-(r) \, dr \quad (9)$$

*The difference between  $r^+$  and  $r^-$  is defined as charge transfer distance,  $d^{\text{CT}}$  and  $t$  index are used to assess the degree of separation between  $\rho^+(r)$  and  $\rho^-(r)$  regions:*

$$d^{\text{CT}} = |r^+ - r^-| \quad (8)$$

$$t = d^{CT} - H \quad (9)$$

In addition, the  $H$  index is proposed as half of the sum of centroids axis along with the  $D$ – $A$  direction.

## 2. Simulations of the electron injection

The time-dependent survival probabilities (TDSP) curves were defined as the probability of the photo-excited electron that is still in the adsorbed dye molecule at time  $t$ . Therefore, the TDSP can be computed by applying the time-evolved electronic wave function into the atomic orbitals of the adsorbed dye molecule.

The time-evolved wave function  $\varphi(t)$  can be written as a linear combination of atomic orbitals:

$$\varphi(t) = \sum_{i,j} B_{i,j}(t) \phi_{i,j} \quad (10)$$

where  $\phi_{i,j}$  represents the orbital  $j$  of the  $i$ -th atom. The expansion coefficients  $B_{i,j}(t)$  in Eq. (7), can now be computed according to the following equation:

$$B_{i,j}(t) = \sum_k Q_{i,j}^k C_k \exp(-\frac{i}{\hbar} E_k t) \quad (11)$$

The coefficient  $C_k$  in Eq. (8) is defined by the expansion of the initial state in an orthonormal basis set of  $\phi(k)$ ,

$$\varphi(0) = \sum_k C_k \phi(k) \quad (12)$$

The coefficient  $Q_{i,j}^k$  in this equation is defined according to the expansion of  $\phi(k)$  as a linear combination of the atomic orbitals:

$$\phi(k) = \sum_j Q_j^k \phi_j \quad (13)$$

The eigenvalue  $E_k$  in Eq. (8) can be obtained by solving the extend Hückel theory (EH) eigenvalue problem:

$$HQ^k = E_k SQ^k \quad (14)$$

where  $H$  is the  $EH$  matrix and  $S$  is the overlap matrix in the atomic orbital basis. The non-diagonal Hamiltonian matrix is herein determined by the Wolfsberg-Helmholtz constant  $K$  and the overlapping matrix element:

$$H_{j,m} = KS_{jm} \frac{H_{jj} + H_{mm}}{2} \quad (15)$$

Usually, the constant  $K$  is set to be 1.75, and the  $S_{jm}$  is defined according to the overlap of the atomic orbitals:

$$S_{jm} = \langle \varphi_j | \varphi_m \rangle \quad (16)$$

Therefore, the projection of the time-evolved electronic wave function onto the atomic orbitals of the adsorbed dye molecule can be obtained as follow:

$$\rho_{MOL}(t) = | \sum_j^{MOL} \sum_m B_j^*(t) B_m(t) S_{jm} | \quad (17)$$

Note that the sum over  $m$  includes all of the atoms in the research object, whereas the sum over  $j$  only includes the atoms in the adsorbed dye molecule.

## References

- [1] Grätzel, M. Recent Advances in Sensitized Mesoscopic Solar Cells. *Acc. Chem. Res.* **2009**, *42*, 1788-1798.
- [2] Katoh, R.; Furube, A.; Yoshihara, T.; Hara, K.; Fujihashi, G.; Takano, S.; Murata, S.; Arakawa, H.; Tachiya, M. Efficiencies of Electron Injection from Excited N3 Dye into Nanocrystalline Semiconductor ( $ZrO_2$ ,  $TiO_2$ ,  $ZnO$ ,  $Nb_2O_5$ ,  $SnO_2$ ,  $In_2O_3$ ) Films. *J. Phys. Chem. B* **2004**, *108*, 4818-4822.
- [3] Grätzel, M. Photoelectrochemical Cells. *Nature* **2001**, *414*, 338-344.
- [4] Daeneke, T.; Mozer, A. J.; Uemura, Y.; Makuta, S.; Fekete, M.; Tachibana, Y.;

Koumura, N.; Bach, U.; Spiccia, L. Dye Regeneration Kinetics in Dye-Sensitized Solar Cells. *J. Am. Chem. Soc.* **2012**, *134*, 16925-16928.

[5] Ciofini, I.; Bahers, T. L.; Adamo, C.; Odobel, F.; Jacquemin, D. Through-Space Charge Transfer in Rod-Like Molecules: Lessons from Theory. *J. Phys. Chem. C* **2012**, *116*, 11946-11955.

[6] Lu, T.; Chen, F. W. Multiwfn: A Multifunctional Wavefunction Analyzer. *J. Comput. Chem.* **2012**, *33*, 580-592.

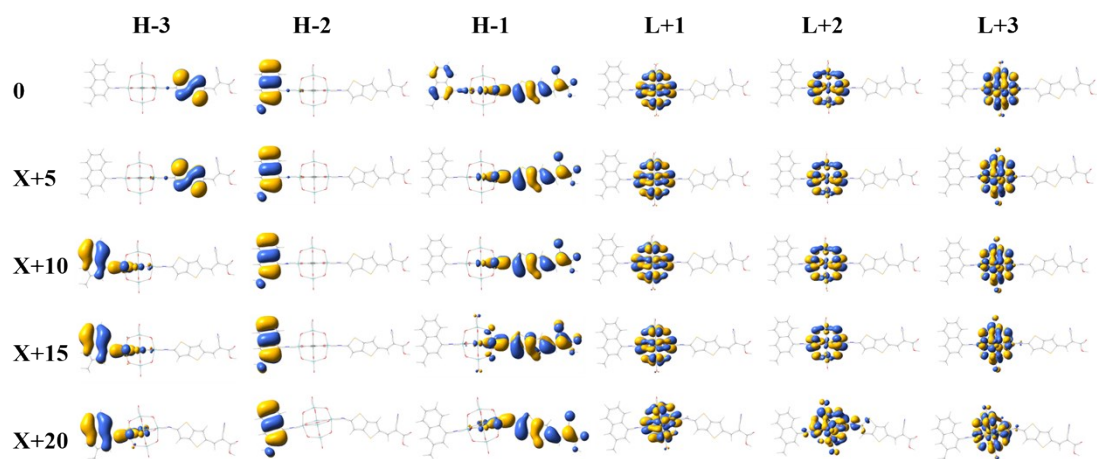

**Figure S1.** Orbital distributions of studied dye under different electric field strengths.

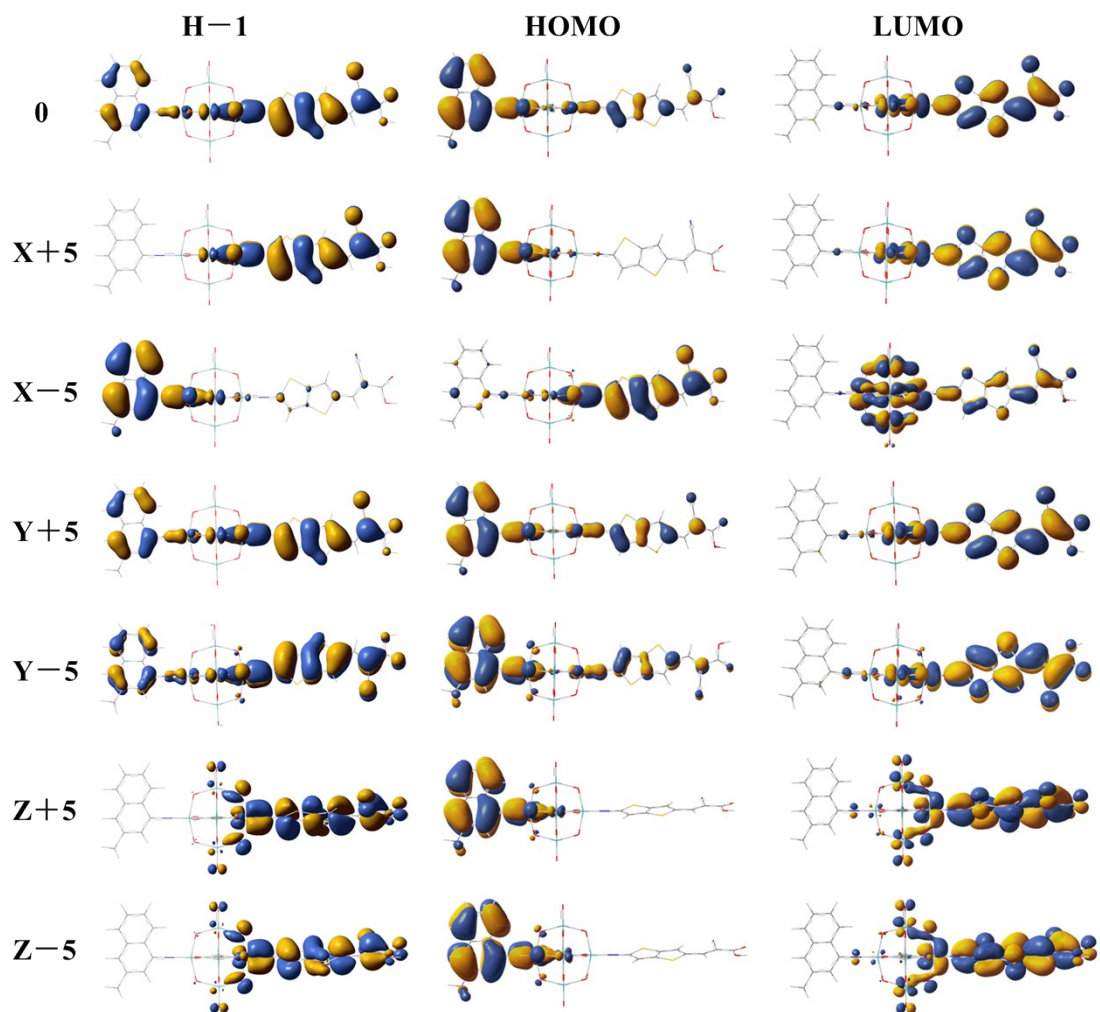

**Figure S2.** Frontier molecular orbital distributions of studied dye under different electric field directions.



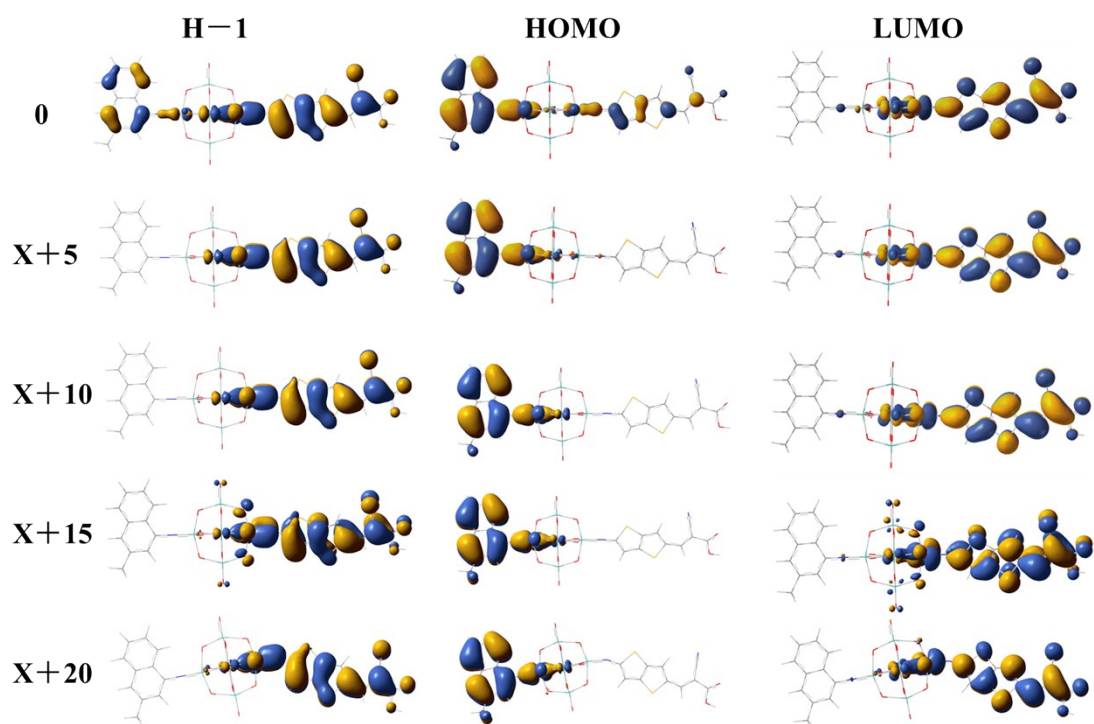

**Figure S3.** Frontier molecular orbital distributions of studied dye under different electric field strengths.

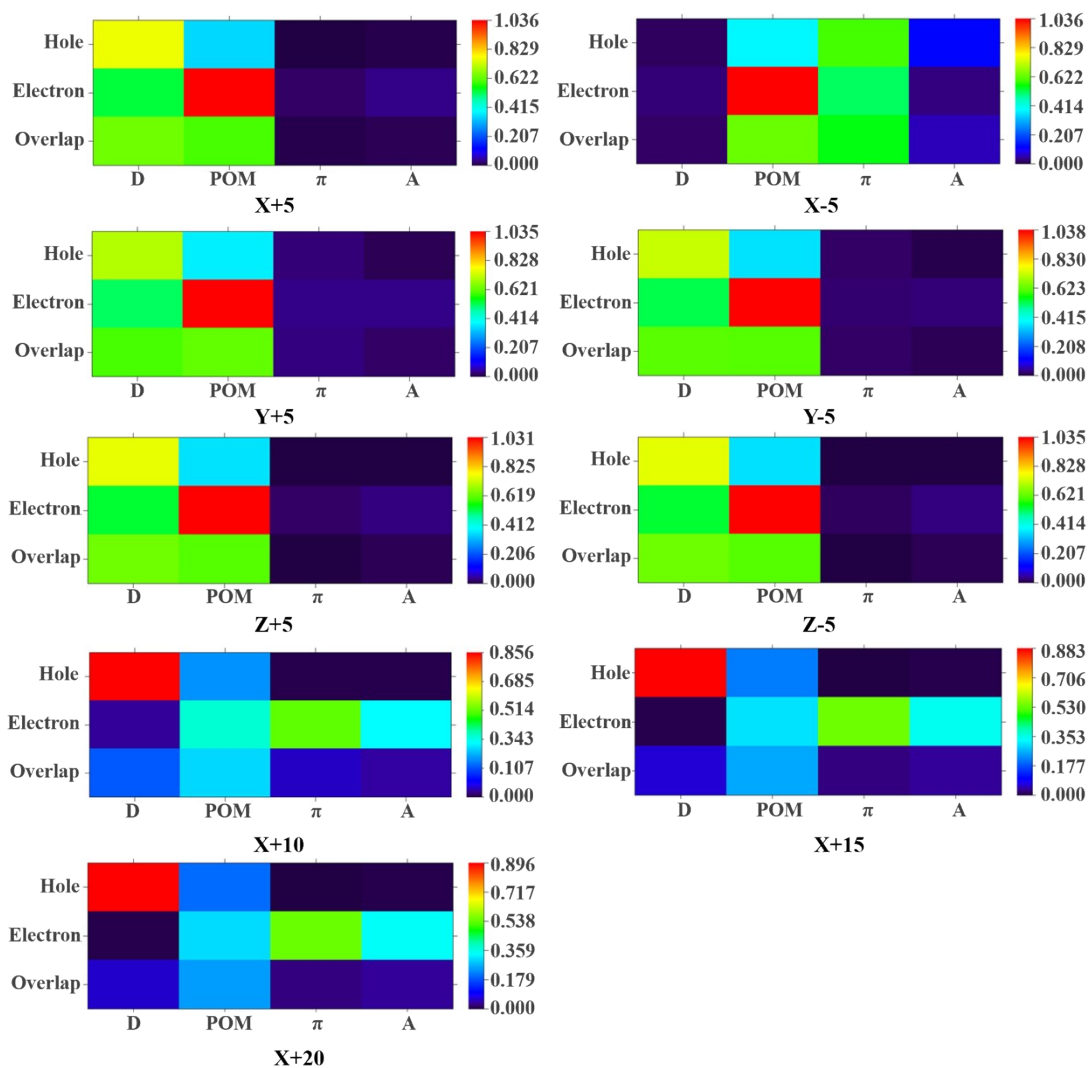

**Figure S4.** The heat map of studied dye under different electric field directions and strengths.

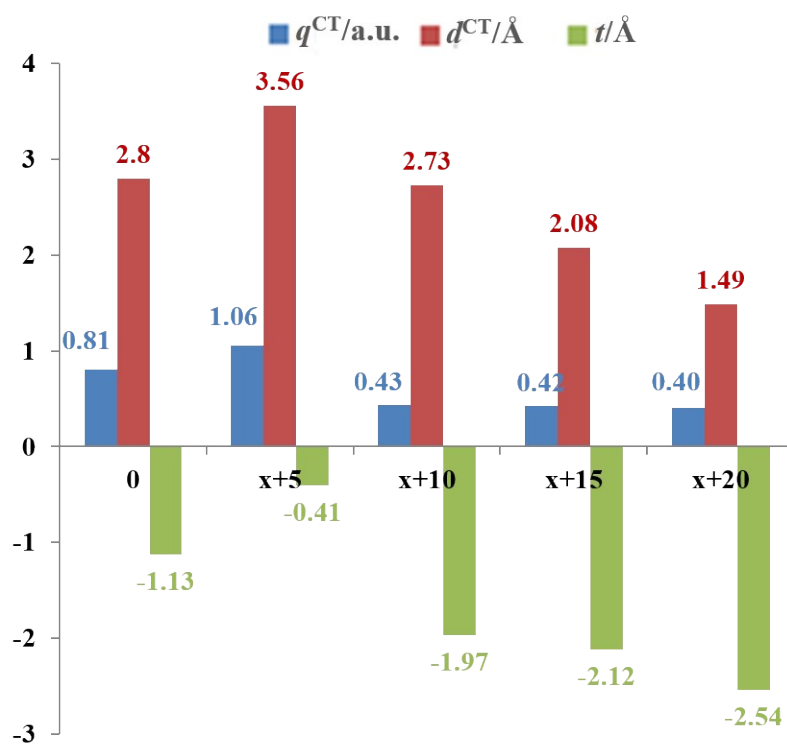

**Figure S5.** The key ICT parameters of studied dye under different electric field strengths.

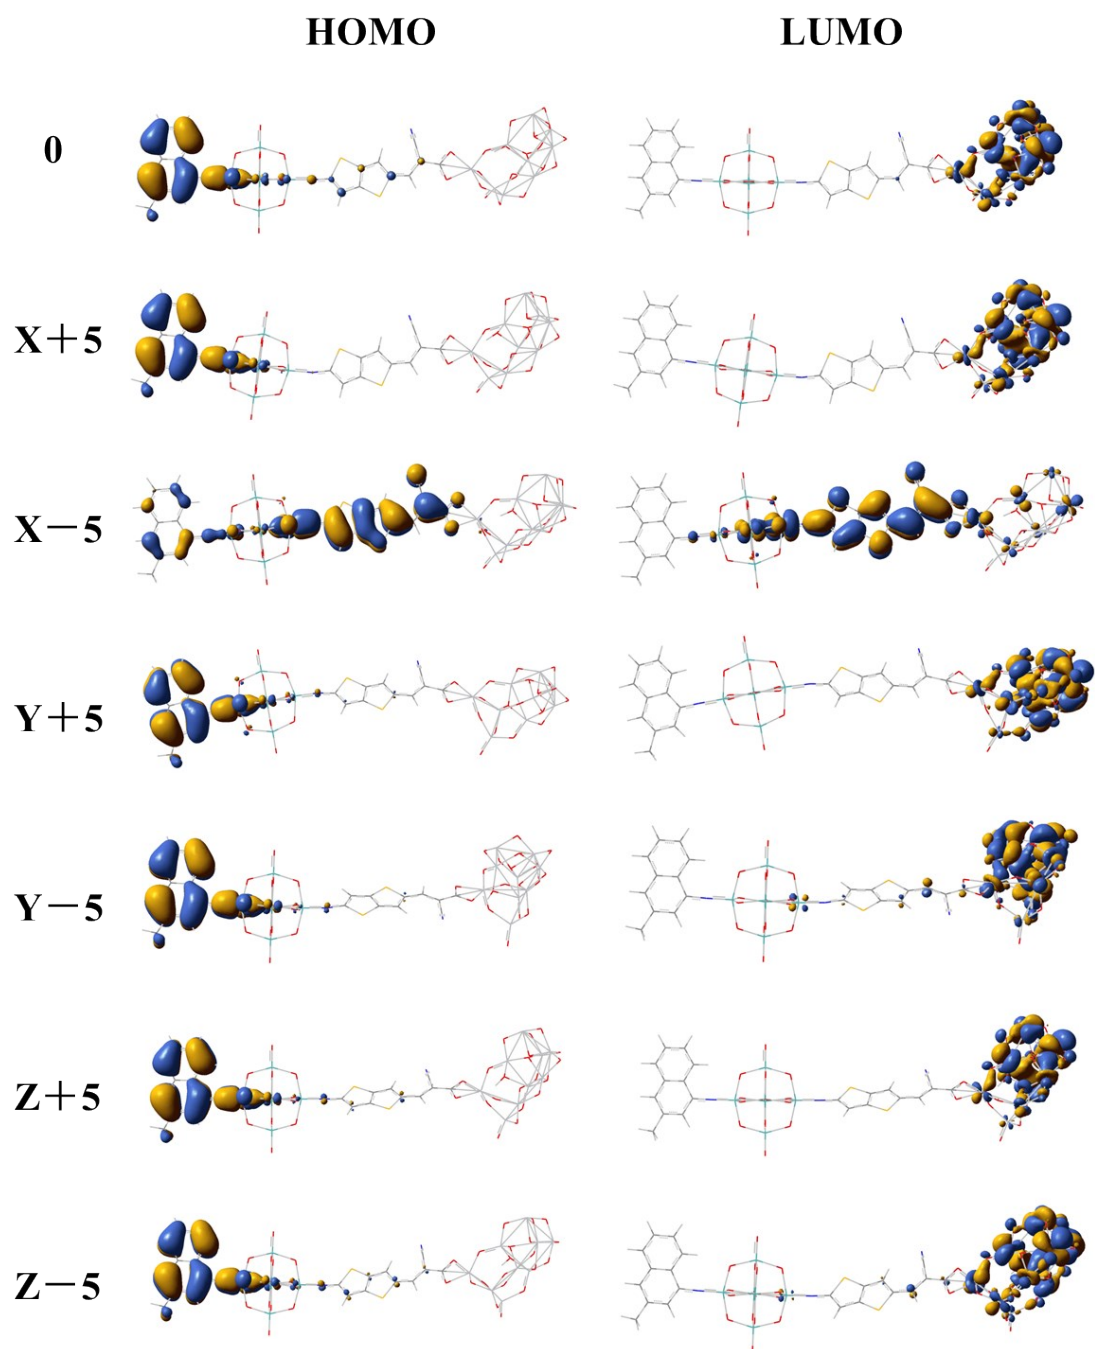

**Figure S6.** Frontier molecular orbital distributions of dye-TiO<sub>2</sub> system under different electric field directions.

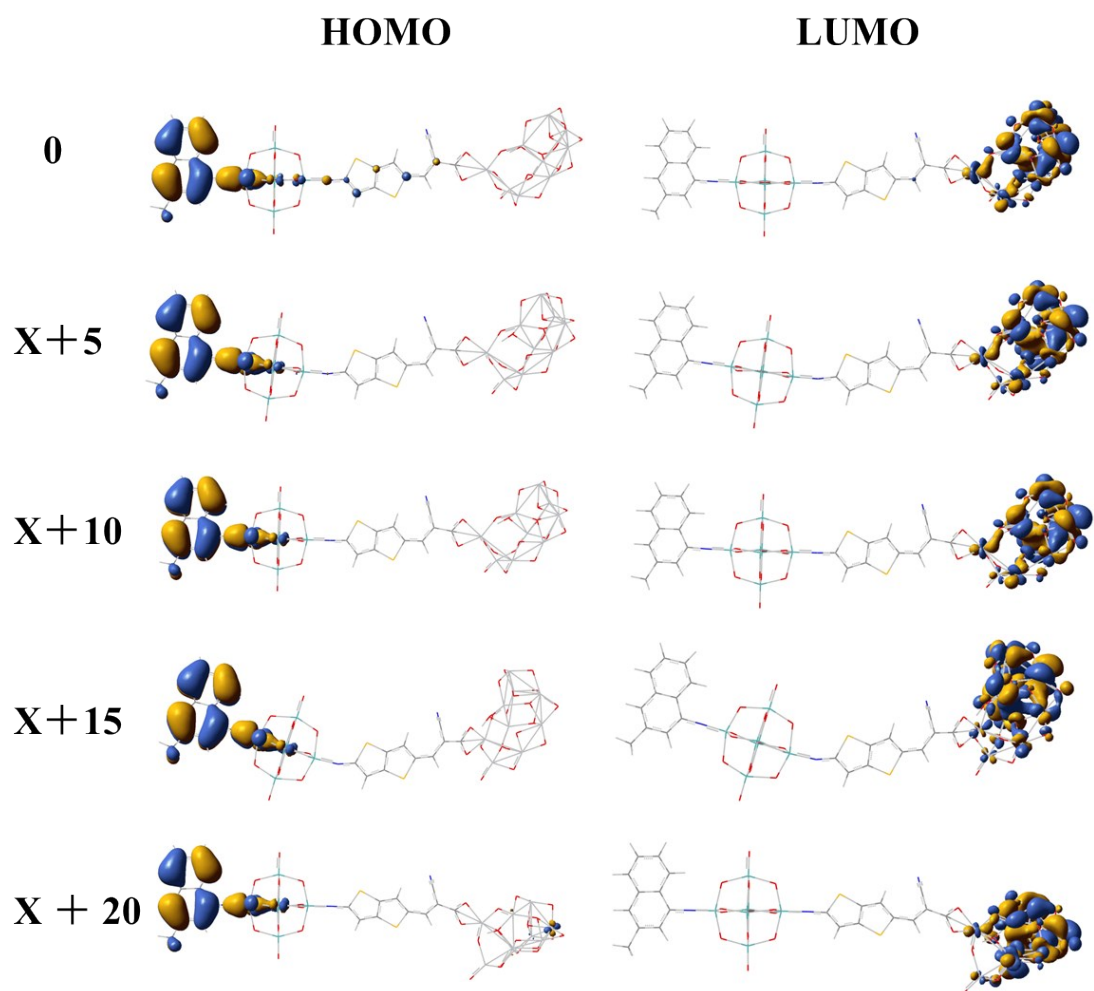

**Figure S7.** Frontier molecular orbital distributions of dye-TiO<sub>2</sub> system under different electric field strengths.

**Table S1.** Partial molecular orbital compositions (%) of studied dye under different electric field directions.

| Field ( $10^{-4}$ a.u) | Orbital | Major component |      |       |      |
|------------------------|---------|-----------------|------|-------|------|
|                        |         | D               | POM  | $\pi$ | A    |
| <b>0</b>               | LUMO    | 0               | 0.30 | 0.31  | 0.32 |
|                        | HOMO    | 0.67            | 0.14 | 0.09  | 0.02 |
| <b>X+5</b>             | LUMO    | 0               | 0.26 | 0.35  | 0.32 |
|                        | HOMO    | 0.77            | 0.15 | 0     | 0    |
| <b>X-5</b>             | LUMO    | 0               | 0.80 | 0.05  | 0.05 |
|                        | HOMO    | 0               | 0.16 | 0.57  | 0.16 |
| <b>Y+5</b>             | LUMO    | 0               | 0.30 | 0.31  | 0.33 |
|                        | HOMO    | 0.61            | 0.11 | 0.14  | 0.02 |
| <b>Y-5</b>             | LUMO    | 0               | 0.29 | 0.34  | 0.29 |
|                        | HOMO    | 0.68            | 0.14 | 0.04  | 0.02 |
| <b>Z+5</b>             | LUMO    | 0               | 0.28 | 0.34  | 0.29 |
|                        | HOMO    | 0.79            | 0.15 | 0     | 0    |
| <b>Z-5</b>             | LUMO    | 0               | 0.28 | 0.34  | 0.29 |
|                        | HOMO    | 0.79            | 0.15 | 0     | 0    |

**Table S2.** Partial molecular orbital compositions (%) of studied dye under different electric field strengths.

| Field ( $10^{-4}$<br>a.u) | Orbital | Major assignment |      |       |      |
|---------------------------|---------|------------------|------|-------|------|
|                           |         | D                | POM  | $\pi$ | A    |
| <b>0</b>                  | LUMO    | 0                | 0.30 | 0.31  | 0.32 |
|                           | HOMO    | 0.67             | 0.14 | 0.09  | 0.02 |
| <b>X+5</b>                | LUMO    | 0                | 0.26 | 0.35  | 0.32 |
|                           | HOMO    | 0.77             | 0.15 | 0     | 0    |
| <b>X+10</b>               | LUMO    | 0                | 0.24 | 0.29  | 0.37 |
|                           | HOMO    | 0.80             | 0.15 | 0     | 0    |
| <b>X+15</b>               | LUMO    | 0                | 0.21 | 0.34  | 0.34 |
|                           | HOMO    | 0.79             | 0.05 | 0     | 0    |
| <b>X+20</b>               | LUMO    | 0                | 0.47 | 0.20  | 0.21 |
|                           | HOMO    | 0.80             | 0.05 | 0     | 0    |

**Table S3.** The calculated excitation energies  $E_v$  (eV), maximum absorption wavelengths  $\lambda_{\max}$  (nm), oscillator strengths  $f$  and major electronic compositions of dye-TiO<sub>2</sub> system under different electric field directions.

| Field (10 <sup>-4</sup> a.u) | $E_v$ | $\lambda_{\max}$ | $f$  | Major assignment         |
|------------------------------|-------|------------------|------|--------------------------|
| <b>0</b>                     | 2.24  | 554              | 2.26 | H-1→L(43%) H→L(53%)      |
|                              | 2.99  | 415              | 0.24 | H-1→L+6(15%) H→L+15(55%) |
| <b>X+5</b>                   | 2.21  | 560              | 2.08 | H-1→L (29%) H-1→L+1(65%) |
|                              | 2.90  | 428              | 0.22 | H→L+13(12%) H→L+22(59%)  |
| <b>X-5</b>                   | 2.32  | 535              | 2.73 | H→L(96%)                 |
|                              | 3.09  | 401              | 0.32 | H-2→L(12%) H-1→L+7(28%)  |
| <b>Y+5</b>                   | 2.25  | 550              | 2.34 | H-1→L(59%) H→L(38%)      |
|                              | 2.90  | 427              | 0.17 | H→L+13(54%)              |
| <b>Y-5</b>                   | 2.25  | 550              | 2.23 | H-1→L(58%) H→L(37%)      |
|                              | 2.88  | 431              | 0.21 | H→L+11(11%) H→L+12(59%)  |
| <b>Z+5</b>                   | 2.26  | 548              | 2.35 | H-1→L(64%) H→L(28%)      |
|                              | 2.90  | 428              | 0.22 | H→L+12(13%) H→L+13(43%)  |
| <b>Z-5</b>                   | 2.24  | 553              | 2.13 | H-1→L(46%) H→L(50%)      |
|                              | 2.99  | 415              | 0.14 | H-1→L+6(33%) H→L+17(19%) |



**Table S4.** The calculated excitation energies  $E_v$  (eV), maximum absorption wavelengths  $\lambda_{\max}$  (nm), oscillator strengths  $f$  and major electronic compositions of dye-TiO<sub>2</sub> system under different electric field strengths.

| Field (10 <sup>-4</sup> a.u) | $E_v$ | $\lambda_{\max}$ | $f$  | Major assignment          |
|------------------------------|-------|------------------|------|---------------------------|
| <b>0</b>                     | 2.24  | 554              | 2.26 | H-1→L(43%) H→L(53%)       |
|                              | 2.99  | 415              | 0.24 | H-1→L+6(15%) H→L+15(55%)  |
| <b>X+5</b>                   | 2.21  | 560              | 2.08 | H-1→L (29%) H-1→L+1(65%)  |
|                              | 2.90  | 428              | 0.22 | H→L+13(12%) H→L+22(59%)   |
| <b>X+10</b>                  | 2.15  | 576              | 2.07 | H-1→L+2(23%) H-1→L+4(49%) |
|                              | 2.80  | 443              | 0.17 | H→L+23(13%) H→L+25(35%)   |
| <b>X+15</b>                  | 2.08  | 597              | 1.94 | H-1→L+5(29%) H-1→L+6(48%) |
|                              | 2.70  | 460              | 0.09 | H→L+27(31%) H→L+29(21%)   |
| <b>X+20</b>                  | 2.05  | 605              | 0.83 | H-2→L+7(19%) H-2→L+8(51%) |
